# Supplementary material for: Ketoanalogues Supplemental Low Protein Diet Safely Decreases Short-Term Risk of Dialysis among CKD Stage 4 Patients
Source: MDPI journal article supplement (doi:10.3390/nu14194020), 2022-09-28
Supplement: s1 [file s1]

**Table S1.** Baseline characteristics of patients receiving ketoanalogues supplemental low protein diet after IPTW and EM imputation.

| Variables                                                        | Continuation   | Discontinuation | STD   | P value |
|------------------------------------------------------------------|----------------|-----------------|-------|---------|
| Age, years                                                       | 67.8 ± 13.9    | 67.9 ± 14.2     | -0.01 | 0.88    |
| Age ≥65 years                                                    | 60.6%          | 61.2%           | -0.01 | 0.85    |
| Male                                                             | 62.4%          | 63.1%           | -0.01 | 0.80    |
| Body mass index, kg/m <sup>2</sup>                               | 25.4 ± 17.0    | 24.9 ± 4.8      | 0.04  | 0.38    |
| eGFR at index, ml/min/1.73m <sup>2</sup>                         | 20.9 ± 4.8     | 20.8 ± 4.5      | 0.01  | 0.87    |
| Comorbidities                                                    |                |                 |       |         |
| Coronary artery disease                                          | 29.2%          | 26.9%           | 0.05  | 0.42    |
| Hypertension                                                     | 81.6%          | 82.3%           | -0.02 | 0.80    |
| Diabetes mellitus                                                | 52.5%          | 53.1%           | -0.01 | 0.86    |
| Atrial fibrillation                                              | 5.9%           | 6.7%            | -0.03 | 0.62    |
| Liver cirrhosis                                                  | 8.5%           | 8.5%            | <0.01 | 0.99    |
| Peripheral artery disease                                        | 9.2%           | 9.3%            | <0.01 | 1.00    |
| Dementia                                                         | 5.8%           | 6.0%            | -0.01 | 0.90    |
| Systemic lupus erythematosus                                     | 1.4%           | 1.2%            | 0.01  | 1.00    |
| Hepatitis B infection                                            | 5.4%           | 5.5%            | <0.01 | 0.90    |
| Hepatitis C infection                                            | 4.0%           | 4.0%            | <0.01 | 1.00    |
| Heart failure hospitalization                                    | 7.8%           | 7.7%            | <0.01 | 0.99    |
| Myocardial infarction                                            | 7.3%           | 7.0%            | 0.01  | 0.91    |
| Stroke                                                           | 10.6%          | 11.0%           | -0.01 | 0.84    |
| No. of outpatient visits on nephrology in the previous year      |                |                 |       | 0.95    |
| 0                                                                | 13.9%          | 14.6%           | -0.02 |         |
| 1-5                                                              | 58.8%          | 59.7%           | -0.02 |         |
| 6-10                                                             | 21.4%          | 20.0%           | 0.03  |         |
| >10                                                              | 5.9%           | 5.7%            | 0.01  |         |
| No. of outpatient visits on all departments in the previous year | 12.8 ± 9.6     | 12.7 ± 8.9      | 0.01  | 0.82    |
| Admission in the previous year                                   | 35.2%          | 37.3%           | -0.04 | 0.49    |
| Follow-up years                                                  | 1.5 [0.7, 3.5] | 1.3 [0.6, 2.9]  | 0.08  | 0.16    |

Abbreviation: IPTW, inverse probability of treatment weighting; EM, expectation-maximization; STD, standardized difference; eGFR, estimated glomerular filtration rate.

Data were presented as frequency (percentage), mean ± standard deviation or median [25<sup>th</sup>, 75<sup>th</sup> percentile].

**Table S2.** Medication and laboratory data at baseline of patients receiving ketoanalogues supplemental low protein diet after IPTW and EM imputation.

| Variables                            | Continuation | Discontinuation | STD   | P value |
|--------------------------------------|--------------|-----------------|-------|---------|
| Medication at baseline               |              |                 |       |         |
| ACEi/ARB                             | 59.0%        | 59.9%           | -0.02 | 0.76    |
| Beta-blockers                        | 26.3%        | 26.7%           | -0.01 | 0.89    |
| Calcium-channel blocker              | 45.2%        | 45.4%           | <0.01 | 0.95    |
| Mineralocorticoid receptor antagonis | 8.2%         | 9.2%            | -0.04 | 0.59    |
| Loop diuretics                       | 33.7%        | 33.8%           | <0.01 | 0.92    |
| Nitrates                             | 12.8%        | 12.8%           | <0.01 | 1.00    |
| Vasodilator                          | 6.7%         | 6.5%            | 0.01  | 0.90    |
| Thiazide                             | 8.4%         | 8.5%            | <0.01 | 0.91    |
| Antiplatelet agents                  | 31.3%        | 32.6%           | -0.03 | 0.65    |
| NSAIDs                               | 10.8%        | 10.8%           | <0.01 | 1.00    |
| Steroid                              | 13.4%        | 13.4%           | <0.01 | 1.00    |
| Proton pump inhibitor                | 17.2%        | 17.4%           | -0.01 | 0.88    |
| Insulin                              | 13.9%        | 14.6%           | -0.02 | 0.74    |
| Oral hypoglycemic agents             | 36.7%        | 37.4%           | -0.01 | 0.85    |
| Pentoxifyllin                        | 44.0%        | 43.9%           | <0.01 | 1.00    |
| Sodium bicarbonate                   | 10.4%        | 10.2%           | 0.01  | 0.92    |
| Fibrate                              | 5.4%         | 5.1%            | 0.01  | 0.89    |
| Statin                               | 39.6%        | 41.5%           | -0.04 | 0.50    |
| Laboratory data at baseline          |              |                 |       |         |
| Blood urine nitrogen, mg/dL          | 43.2 ± 16.8  | 43.5 ± 18.8     | -0.02 |         |
| Creatinine, mg/dL                    | 2.9 ± 0.8    | 2.9 ± 0.8       | <0.01 |         |
| Proteinuria group, mg/dL             |              |                 |       | 0.92    |
| Negative (0-4)                       | 16.1%        | 15.2%           | 0.02  |         |
| Trace (5-29)                         | 6.8%         | 6.4%            | 0.01  |         |
| ≥1+ (≥30)                            | 77.1%        | 78.3%           | -0.03 |         |
| CO <sub>2</sub>                      | 23.0 ± 3.3   | 23.0 ± 3.7      | <0.01 | 0.89    |
| Potassium, mg/dL                     | 4.4 ± 0.6    | 4.4 ± 0.7       | -0.01 | 0.67    |
| Sodium, mg/dL                        | 138.8 ± 3.5  | 138.8 ± 3.5     | <0.01 | 0.76    |
| Calcium, mg/dL                       | 8.9 ± 0.6    | 8.9 ± 0.6       | <0.01 | 0.94    |
| Phosphorus, mg/dL                    | 3.9 ± 0.7    | 3.9 ± 0.7       | -0.03 | 0.18    |
| HDL, mg/dL                           | 45.3 ± 10.3  | 45.0 ± 9.6      | 0.03  | 0.68    |
| LDL, mg/dL                           | 76.6 ± 45.7  | 76.2 ± 35.7     | 0.01  | 0.96    |
| Total cholesterol, mg/dL             | 176.7 ± 33.6 | 175.4 ± 36.5    | 0.04  | 0.43    |
| HbA1C, %                             | 6.6 ± 1.3    | 6.6 ± 1.4       | -0.02 | 0.92    |
| Albumin, mg/dL                       | 3.9 ± 0.5    | 3.9 ± 0.5       | <0.01 | 0.79    |
| Hemoglobin, g/dL                     | 10.5 ± 1.7   | 10.5 ± 1.8      | -0.01 | 0.99    |
| Serum uric acid, mg/dL               | 7.2 ± 1.8    | 7.3 ± 1.8       | -0.01 | 0.70    |

Abbreviation: IPTW, inverse probability of treatment weighting; EM, expectation-maximization; STD, standardized difference; ACEi/ARB, angiotensin-converting enzyme inhibitors/angiotensin receptor blocker; NSAIDs, non-steroidal anti-inflammatory drugs; LDL, low-density lipoprotein; HDL, high-density lipoprotein; HbA1C, glycated hemoglobin.

Data were presented as frequency (percentage), mean ± standard deviation or median [25<sup>th</sup>, 75<sup>th</sup> percentile].
